# Supplementary material
Source: PubMed Central journal article supplement (PMC4443895)
Supplement: NIHMS689289-supplement-eTable.pdf [file NIHMS689289-supplement-eTable.pdf]

## Supplementary Online Content

Tomlinson T, De Vries R, Ryan K, Kim HM, Lehpamer N, et al. Moral concerns and the willingness to donate to a research biobank. *JAMA*. doi: 10.1001/jama.2014.16363

**eTable.** The sociodemographics of survey respondents and non-respondents compared to the Current Population Survey

This supplementary material has been provided by the authors to give readers additional information about their work.

**eTable. The sociodemographics of survey respondents and non-respondents compared to the Current Population Survey**

|                                      | <b>Respondents<br/>(N=1,599)</b> | <b>Nonrespondents<sup>a</sup><br/>(N=1,016)</b> | <b>Respondents<br/>Weighted<br/>(N=1,599)</b> | <b>Current<br/>Population<br/>Survey<sup>b</sup><br/>(N=227,194)</b> |
|--------------------------------------|----------------------------------|-------------------------------------------------|-----------------------------------------------|----------------------------------------------------------------------|
| <b>Age (years), mean (SD)</b>        | 51.1 (15.8)                      | 45.1 (16.5)                                     | 48.1 (16.1)                                   | 48.2                                                                 |
| <b>Gender</b>                        |                                  |                                                 |                                               |                                                                      |
| Female, No. (%)                      | 834 (52.2%)                      | 556 (54.7%)                                     | 831 (52.0%)                                   | 51.72%                                                               |
| <b>Race<sup>c</sup></b>              |                                  |                                                 |                                               |                                                                      |
| White                                | 1,311 (82.0%)                    | 758 (74.6%)                                     | 1,256 (78.6%)                                 | 79.38%                                                               |
| Black/African American               | 149 (9.3%)                       | 151 (14.9%)                                     | 189 (11.8%)                                   | 12.15%                                                               |
| Asian                                | 53 (3.3%)                        | 27 (2.7%)                                       | 81 (5.1%)                                     | 5.62%                                                                |
| American Indian or Alaska Native     | 17 (1.1%)                        | 7 (.7%)                                         | 26 (1.7%)                                     | .96%                                                                 |
| Native Hawaiian/Pacific Islander     | 7 (.4%)                          | 5 (.5%)                                         | 11 (0.7%)                                     | .35%                                                                 |
| 2+ races                             | 62 (3.9%)                        | 64 (6.3%)                                       | 35 (2.2%)                                     | 1.54%                                                                |
| <b>Ethnicity</b>                     |                                  |                                                 |                                               |                                                                      |
| Hispanic                             | 145 (9.1%)                       | 190 (18.7%)                                     | 232 (14.5%)                                   | 14.78%                                                               |
| <b>Education</b>                     |                                  |                                                 |                                               |                                                                      |
| < High School                        | 114 (7.1%)                       | 117 (11.5%)                                     | 185 (11.6%)                                   | 11.37%                                                               |
| High school                          | 480 (30.0%)                      | 318 (31.3%)                                     | 475 (29.7%)                                   | 29.71%                                                               |
| Some college                         | 452 (28.3%)                      | 314 (30.9%)                                     | 452 (28.3%)                                   | 28.14%                                                               |
| ≥ Bachelors Degree                   | 553 (34.6%)                      | 267 (26.3%)                                     | 487 (30.5%)                                   | 30.78%                                                               |
| <b>Household income</b>              |                                  |                                                 |                                               |                                                                      |
| < \$50,000                           | 618 (38.6%)                      | 454 (44.7%)                                     | 659 (41.2%)                                   | 40.37%                                                               |
| \$50,000 - \$99,999                  | 522 (32.6%)                      | 307 (30.2%)                                     | 507 (31.7%)                                   | 32.10%                                                               |
| ≥ \$100,000                          | 459 (28.7%)                      | 255 (25.1%)                                     | 433 (27.1%)                                   | 27.56%                                                               |
| <b>Region</b>                        |                                  |                                                 |                                               |                                                                      |
| Northeast                            | 284 (17.8%)                      | 194 (19.1%)                                     | 291 (18.2%)                                   | 18.21%                                                               |
| Midwest                              | 374 (23.4%)                      | 214 (21.1%)                                     | 342 (21.4%)                                   | 21.32%                                                               |
| South                                | 585 (36.6%)                      | 379 (37.3%)                                     | 594 (37.2%)                                   | 37.18%                                                               |
| West                                 | 356 (22.3%)                      | 229 (22.5%)                                     | 372 (23.3%)                                   | 23.29%                                                               |
| <b>Metropolitan area<sup>d</sup></b> |                                  |                                                 |                                               |                                                                      |
| Yes                                  | 1,331 (83.2%)                    | 857 (84.4%)                                     | 1,345 (84.1%)                                 | 84.8%                                                                |
| No                                   | 268 (16.8%)                      | 159 (15.6%)                                     | 254 (15.9%)                                   | 14.4%                                                                |

a. Includes partial responders.

b. National data generated from the CPS ASEC (Annual Social and Economic Supplement) 2014 dataset. <http://www.census.gov/cps/data/cpstablecreator.html>.

c. Respondents reported their race/ethnicity using categories provided by GfK.

d. National data from the September 2014 CPS dataset. <http://www.census.gov/cps/data/>.
